# Supplementary material for: Distinct Prion Domain Sequences Ensure Efficient Amyloid Propagation by Promoting Chaperone Binding or Processing In Vivo
Source: PubMed Central journal article supplement (PMC5096688; doi:10.1371/journal.pgen.1006417), 2016-11-04
Supplement: pgen.1006417.s005.pdf [file pgen.1006417.s005.pdf]

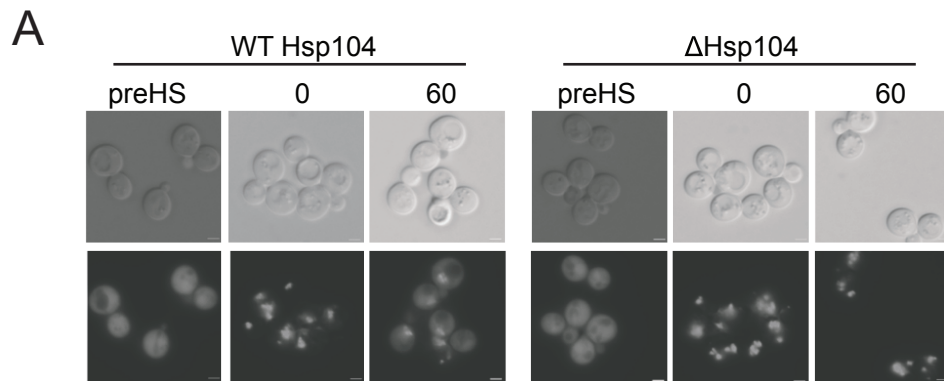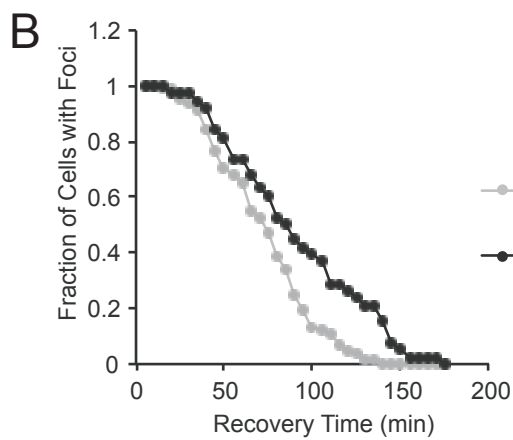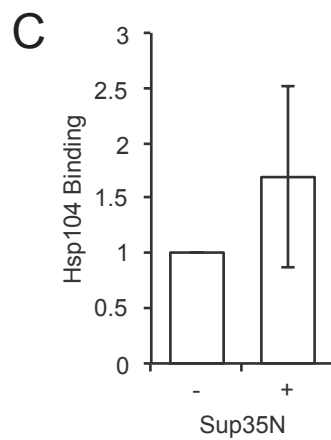

Figure S5
